# Supplementary material for: Demystifying fluorine chemical shifts: electronic structure calculations address origins of seemingly anomalous19F-NMR spectra of fluorohistidine isomers and analogues
Source: Royal Society of Chemistry journal article supplement (doi:10.1039/c5cp05502d), 2015-01-01
Supplement: c5cp05502d1.pdf [file c5cp05502d1.pdf]

**Computational Methods: Energies (in Hartree) and geometries**

All data presented below come from frequency calculation output, using the following method (command line):

#freq BHandHLYP/6-311++g(3df,2p) SCRF=(smd,solvent=water)

**2F-histidine (zwitterionic,  $\tau$ -form):**

Sum of electronic and thermal Free Energies= -647.811993 (Hartree)

Standard orientation:

| Center Number | Atomic Number | Atomic Type | Coordinates (Angstroms) |           |           |
|---------------|---------------|-------------|-------------------------|-----------|-----------|
|               |               |             | X                       | Y         | Z         |
| 1             | 6             | 0           | 2.969487                | 0.127724  | -0.105555 |
| 2             | 6             | 0           | 1.483660                | -0.115520 | -0.381304 |
| 3             | 1             | 0           | 1.259157                | 0.157045  | -1.401344 |
| 4             | 6             | 0           | 0.613678                | 0.681607  | 0.584792  |
| 5             | 1             | 0           | 0.816916                | 0.339678  | 1.595863  |
| 6             | 1             | 0           | 0.918595                | 1.716648  | 0.526309  |
| 7             | 6             | 0           | -0.839896               | 0.589411  | 0.294192  |
| 8             | 6             | 0           | -1.714070               | 1.581136  | 0.028023  |
| 9             | 1             | 0           | -1.595598               | 2.639900  | -0.039738 |
| 10            | 6             | 0           | -2.712618               | -0.329684 | -0.010413 |
| 11            | 9             | 0           | -3.681265               | -1.192283 | -0.136245 |
| 12            | 7             | 0           | -2.933868               | 0.968719  | -0.164441 |
| 13            | 1             | 0           | -3.812837               | 1.402848  | -0.366751 |
| 14            | 7             | 0           | -1.496639               | -0.633062 | 0.265409  |
| 15            | 8             | 0           | 3.411414                | 1.224880  | -0.474167 |
| 16            | 8             | 0           | 3.590242                | -0.774372 | 0.477760  |
| 17            | 1             | 0           | 1.654813                | -1.916070 | 0.591498  |
| 18            | 1             | 0           | 0.188618                | -1.723025 | -0.166332 |
| 19            | 1             | 0           | 1.555654                | -2.086252 | -1.027710 |
| 20            | 7             | 0           | 1.192131                | -1.565991 | -0.239930 |

Rotational constants (GHZ): 2.5128416 0.4435697 0.3905306  
Standard basis: 6-311++G(3df,2p) (5D, 7F)

**2F-histidine (zwitterionic,  $\pi$ -form):**

Sum of electronic and thermal Free Energies= -647.809993 (Hartree)

Standard orientation:

| Center<br>Number | Atomic<br>Number | Atomic<br>Type | Coordinates (Angstroms) |           |           |
|------------------|------------------|----------------|-------------------------|-----------|-----------|
|                  |                  |                | X                       | Y         | Z         |
| 1                | 6                | 0              | 2.060744                | -0.971818 | 0.007240  |
| 2                | 6                | 0              | 1.647883                | 0.470355  | -0.326486 |
| 3                | 1                | 0              | 1.273847                | 0.469458  | -1.341873 |
| 4                | 6                | 0              | 0.620283                | 1.096334  | 0.615418  |
| 5                | 1                | 0              | 0.849277                | 0.800765  | 1.634165  |
| 6                | 1                | 0              | 0.719372                | 2.173890  | 0.567206  |
| 7                | 6                | 0              | -0.792125               | 0.787885  | 0.282696  |
| 8                | 6                | 0              | -1.846371               | 1.595310  | 0.035764  |
| 9                | 1                | 0              | -1.866265               | 2.663988  | 0.022946  |
| 10               | 6                | 0              | -2.577680               | -0.358254 | -0.105670 |
| 11               | 9                | 0              | -3.332625               | -1.412613 | -0.275761 |
| 12               | 7                | 0              | -2.986101               | 0.851897  | -0.209015 |
| 13               | 7                | 0              | -1.290932               | -0.491917 | 0.194037  |
| 14               | 8                | 0              | 3.264703                | -1.240892 | -0.106715 |
| 15               | 8                | 0              | 1.153445                | -1.752593 | 0.330893  |
| 16               | 1                | 0              | 2.723241                | 2.179599  | -0.830532 |
| 17               | 1                | 0              | 3.179022                | 1.519280  | 0.602292  |
| 18               | 1                | 0              | 3.624190                | 0.786244  | -0.783968 |
| 19               | 7                | 0              | 2.875235                | 1.306913  | -0.341296 |
| 20               | 1                | 0              | -0.718045               | -1.318960 | 0.258343  |

Rotational constants (GHZ): 1.9570109 0.5378401 0.4361949  
Standard basis: 6-311++G(3df,2p) (5D, 7F)

**4F-histidine (zwitterionic,  $\tau$ -form):**

Sum of electronic and thermal Free Energies= -647.803872 (Hartree)

Standard orientation:

| Center Number | Atomic Number | Atomic Type | Coordinates (Angstroms) |           |           |
|---------------|---------------|-------------|-------------------------|-----------|-----------|
|               |               |             | X                       | Y         | Z         |
| 1             | 6             | 0           | 2.776432                | 0.389688  | -0.104530 |
| 2             | 6             | 0           | 1.381465                | -0.182588 | -0.364443 |
| 3             | 1             | 0           | 1.111311                | 0.000938  | -1.394042 |
| 4             | 6             | 0           | 0.344067                | 0.427172  | 0.569831  |
| 5             | 1             | 0           | 0.605724                | 0.171724  | 1.593213  |
| 6             | 1             | 0           | 0.409800                | 1.502103  | 0.482008  |
| 7             | 6             | 0           | -1.043380               | -0.007537 | 0.265534  |
| 8             | 6             | 0           | -2.143607               | 0.733014  | 0.040880  |
| 9             | 6             | 0           | -2.682635               | -1.347118 | -0.116218 |
| 10            | 7             | 0           | -3.182695               | -0.101536 | -0.198338 |
| 11            | 1             | 0           | -4.130449               | 0.159435  | -0.390958 |
| 12            | 7             | 0           | -1.413085               | -1.333453 | 0.160851  |
| 13            | 8             | 0           | 2.935362                | 1.578871  | -0.414669 |
| 14            | 8             | 0           | 3.615635                | -0.371165 | 0.401225  |
| 15            | 1             | 0           | 1.905482                | -1.879260 | 0.675771  |
| 16            | 1             | 0           | 0.456616                | -2.018830 | -0.128310 |
| 17            | 1             | 0           | 1.904393                | -2.107068 | -0.937969 |
| 18            | 7             | 0           | 1.409820                | -1.657057 | -0.179300 |
| 19            | 9             | 0           | -2.319540               | 2.032647  | 0.027232  |
| 20            | 1             | 0           | -3.287332               | -2.215969 | -0.266073 |

Rotational constants (GHZ): 1.9788549 0.5182190 0.4242283  
Standard basis: 6-311++G(3df,2p) (5D, 7F)

**4F-histidine (zwitterionic,  $\pi$ -form):**

Sum of electronic and thermal Free Energies= -647.809568 (Hartree)

Standard orientation:

| Center Number | Atomic Number | Atomic Type | Coordinates (Angstroms) |           |           |
|---------------|---------------|-------------|-------------------------|-----------|-----------|
|               |               |             | X                       | Y         | Z         |
| 1             | 6             | 0           | 2.253077                | -0.713724 | -0.023311 |
| 2             | 6             | 0           | 1.438601                | 0.559509  | -0.301460 |
| 3             | 1             | 0           | 1.112382                | 0.508420  | -1.331967 |
| 4             | 6             | 0           | 0.245251                | 0.801845  | 0.619154  |
| 5             | 1             | 0           | 0.529154                | 0.557656  | 1.637801  |
| 6             | 1             | 0           | 0.011817                | 1.859594  | 0.601927  |
| 7             | 6             | 0           | -0.994860               | 0.087042  | 0.233836  |
| 8             | 6             | 0           | -2.248351               | 0.528084  | -0.011363 |
| 9             | 6             | 0           | -2.384508               | -1.540948 | -0.224615 |
| 10            | 7             | 0           | -3.115590               | -0.454827 | -0.289923 |
| 11            | 7             | 0           | -1.118741               | -1.270249 | 0.091931  |
| 12            | 8             | 0           | 3.483674                | -0.611524 | -0.133710 |
| 13            | 8             | 0           | 1.615213                | -1.740133 | 0.250793  |
| 14            | 1             | 0           | 1.996550                | 2.523426  | -0.708240 |
| 15            | 1             | 0           | 2.529276                | 1.981785  | 0.746190  |
| 16            | 1             | 0           | 3.259434                | 1.446394  | -0.613297 |
| 17            | 7             | 0           | 2.365253                | 1.718336  | -0.218802 |
| 18            | 1             | 0           | -0.330893               | -1.892774 | 0.156344  |
| 19            | 9             | 0           | -2.659368               | 1.786632  | 0.015622  |
| 20            | 1             | 0           | -2.736210               | -2.534606 | -0.401905 |

Rotational constants (GHZ): 1.8483307 0.5761774 0.4523899  
Standard basis: 6-311++G(3df,2p) (5D, 7F)

**2F-(5-methyl)-imidazole(zwitterionic,  $\tau$ -form):**

Sum of electronic and thermal Free Energies= -364.653544 (Hartree)

Standard orientation:

| Center Number | Atomic Number | Atomic Type | Coordinates (Angstroms) |           |           |
|---------------|---------------|-------------|-------------------------|-----------|-----------|
|               |               |             | X                       | Y         | Z         |
| 1             | 7             | 0           | 0.002130                | -0.950300 | 0.000001  |
| 2             | 7             | 0           | 0.811842                | 1.093873  | -0.000002 |
| 3             | 6             | 0           | -1.049221               | -0.045332 | 0.000000  |
| 4             | 6             | 0           | -2.460480               | -0.493187 | -0.000001 |
| 5             | 6             | 0           | -0.564130               | 1.214192  | -0.000003 |
| 6             | 6             | 0           | 1.049747                | -0.211184 | 0.000000  |
| 7             | 1             | 0           | -2.680177               | -1.096465 | 0.874027  |
| 8             | 1             | 0           | -3.127195               | 0.359000  | -0.000005 |
| 9             | 1             | 0           | -2.680174               | -1.096473 | -0.874024 |
| 10            | 1             | 0           | -1.046733               | 2.166492  | -0.000008 |
| 11            | 9             | 0           | 2.276278                | -0.661095 | 0.000003  |
| 12            | 1             | 0           | 1.494470                | 1.825357  | 0.000019  |

Rotational constants (GHZ): 7.1447376 2.1146359 1.6480868  
Standard basis: 6-311++G(3df,2p) (5D, 7F)

**2F-(5-methyl)-imidazole(zwitterionic,  $\pi$ -form):**

Sum of electronic and thermal Free Energies= -364.653776 (Hartree)

Standard orientation:

| Center<br>Number | Atomic<br>Number | Atomic<br>Type | Coordinates (Angstroms) |           |           |
|------------------|------------------|----------------|-------------------------|-----------|-----------|
|                  |                  |                | X                       | Y         | Z         |
| 1                | 7                | 0              | 0.033030                | -0.842574 | -0.000008 |
| 2                | 7                | 0              | 0.859825                | 1.195562  | 0.000010  |
| 3                | 6                | 0              | -1.056581               | 0.005221  | -0.000001 |
| 4                | 6                | 0              | -2.451857               | -0.483290 | 0.000004  |
| 5                | 6                | 0              | -0.525315               | 1.245679  | -0.000006 |
| 6                | 6                | 0              | 1.109379                | -0.058847 | 0.000001  |
| 7                | 1                | 0              | 0.026441                | -1.843172 | -0.000023 |
| 8                | 1                | 0              | -2.660223               | -1.088104 | 0.875562  |
| 9                | 1                | 0              | -3.129512               | 0.359355  | -0.000008 |
| 10               | 1                | 0              | -2.660220               | -1.088127 | -0.875539 |
| 11               | 1                | 0              | -1.046319               | 2.178881  | -0.000008 |
| 12               | 9                | 0              | 2.307343                | -0.582480 | 0.000002  |

Rotational constants (GHZ): 7.2148116 2.1002679 1.6430652  
Standard basis: 6-311++G(3df,2p) (5D, 7F)

**4F-(5-methyl)-imidazole(zwitterionic,  $\tau$ -form):**

Sum of electronic and thermal Free Energies= -364.644504 (Hartree)

Standard orientation:

| Center Number | Atomic Number | Atomic Type | Coordinates (Angstroms) |           |           |
|---------------|---------------|-------------|-------------------------|-----------|-----------|
|               |               |             | X                       | Y         | Z         |
| 1             | 7             | 0           | 0.214894                | -1.489037 | 0.000003  |
| 2             | 7             | 0           | 1.440384                | 0.326775  | 0.000000  |
| 3             | 6             | 0           | -0.631550               | -0.400665 | 0.000001  |
| 4             | 6             | 0           | -2.107608               | -0.512170 | 0.000000  |
| 5             | 6             | 0           | 0.138886                | 0.702157  | 0.000000  |
| 6             | 6             | 0           | 1.426690                | -1.019172 | -0.000005 |
| 7             | 1             | 0           | -2.458843               | -1.046694 | 0.875513  |
| 8             | 1             | 0           | -2.564212               | 0.468962  | -0.000036 |
| 9             | 1             | 0           | -2.458836               | -1.046754 | -0.875479 |
| 10            | 1             | 0           | 2.239224                | 0.929846  | 0.000033  |
| 11            | 9             | 0           | -0.181055               | 1.978421  | -0.000002 |
| 12            | 1             | 0           | 2.326696                | -1.596224 | -0.000008 |

Rotational constants (GHZ): 3.7011083 3.4875494 1.8155098  
Standard basis: 6-311++G(3df,2p) (5D, 7F)

**4F-(5-methyl)-imidazole(zwitterionic,  $\pi$ -form):**

Sum of electronic and thermal Free Energies= -364.654333 (Hartree)

Standard orientation:

| Center Number | Atomic Number | Atomic Type | Coordinates (Angstroms) |           |           |
|---------------|---------------|-------------|-------------------------|-----------|-----------|
|               |               |             | X                       | Y         | Z         |
| 1             | 7             | 0           | 0.396303                | -1.356796 | 0.000132  |
| 2             | 7             | 0           | 1.463972                | 0.553624  | -0.000027 |
| 3             | 6             | 0           | -0.582892               | -0.393072 | 0.000031  |
| 4             | 6             | 0           | -2.035060               | -0.670546 | 0.000033  |
| 5             | 6             | 0           | 0.136000                | 0.749298  | -0.000070 |
| 6             | 6             | 0           | 1.586211                | -0.747797 | 0.000113  |
| 7             | 1             | 0           | 0.245350                | -2.346033 | 0.000209  |
| 8             | 1             | 0           | -2.330614               | -1.236324 | 0.876445  |
| 9             | 1             | 0           | -2.586254               | 0.259622  | -0.000084 |
| 10            | 1             | 0           | -2.330577               | -1.236522 | -0.876265 |
| 11            | 1             | 0           | 2.509315                | -1.286731 | 0.000187  |
| 12            | 9             | 0           | -0.350522               | 1.982321  | -0.000208 |

Rotational constants (GHZ): 3.7136609 3.4888587 1.8189207  
Standard basis: 6-311++G(3df,2p) (5D, 7F)
